# Supplementary material for: The optimization of cell therapy by combinational application with apicidin-treated mesenchymal stem cells after myocardial infarction
Source: PubMed Central journal article supplement (PMC5546480; doi:10.18632/oncotarget.17471), 2017-04-27
Supplement: oncotarget-08-44281-s001.pdf [file oncotarget-08-44281-s001.pdf]

## The optimization of cell therapy by combinational application with apicidin-treated mesenchymal stem cells after myocardial infarction

### SUPPLEMENTARY MATERIALS

#### Supplementary Methods

##### Materials

Antibodies against acetylated histone H3 (AcH3, Merck Millipore, Darmstadt, Germany), acetylated histone H4 (AcH4, Merck Millipore, Darmstadt, Germany), phospho-YAP (Ser397) (Cell Signaling Technology, MA, USA), and phospho-YAP (Ser127) (Cell Signaling Technology, MA, USA) were purchased.

##### HDAC activity assay

HDAC activity for effects of HDAC inhibitors was measured in MSC using the HDAC-Glo I/II Screening Assay (Promega, Wisconsin, USA). In brief cell supernatants were mixed in HDAC-Glo I/II reagent assay mix, containing the substrate and the developer reagent, and transferred to 96-well plates and after 30 min incubation at room temperature, luminescence was measured.

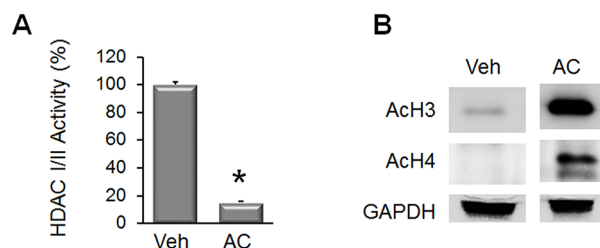

**Supplementary Figure 1: Histone deacetylase (HDAC) activity was assessed in MSC treated with vehicle (Veh) or apicidin (AC, 3  $\mu$ M) for 24 hours. (A) Whole HDAC activity was inhibited in HDAC inhibitor-treated MSCs. (B) Acetylated histone 3 (AcH3) and acetylated histone 4 (AcH4) were dramatically increased in apicidin-treated MSC.**

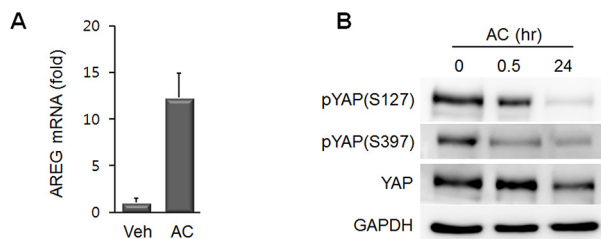

**Supplementary Figure 2: Apicidin treatment decreased YAP. (A) mRNA of AREG, a downstream target of YAP, was increased in apicidin-treated MSC. (B) Phosphorylation of YAP protein was also reduced by apicidin treatment along with YAP protein downregulation.**

**Supplementary Table 1: Echocardiographic evaluation after myocardial infarction (MI)**

|            | MI + PBS       | MI + MSC        | MI + AC/MSC      |
|------------|----------------|-----------------|------------------|
| IVSd (mm)  | 0.512 ± 0.059  | 0.555 ± 0.085   | 0.490 ± 0.077#   |
| IVSs (mm)  | 0.585 ± 0.108  | 0.571 ± 0.010   | 0.571 ± 0.110    |
| LVIDd (mm) | 4.331 ± 0.859  | 4.107 ± 0.054   | 4.195 ± 0.435    |
| LVIDs (mm) | 3.565 ± 0.256  | 3.200 ± 0.424*  | 3.143 ± 0.349*   |
| LVPWd (mm) | 0.546 ± 0.090  | 0.543 ± 0.051   | 0.505 ± 0.086    |
| LVPWs (mm) | 0.734 ± 0.127  | 0.657 ± 0.134*  | 0.624 ± 0.148*   |
| EDV (mL)   | 0.221 ± 0.046  | 0.191 ± 0.072   | 0.187 ± 0.056*   |
| ESV (mL)   | 0.119 ± 0.028  | 0.088 ± 0.032*  | 0.081 ± 0.026*   |
| EF (%)     | 47.196 ± 2.878 | 53.995 ± 3.372* | 56.427 ± 1.797*# |
| SV (mL)    | 0.105 ± 0.022  | 0.104 ± 0.040   | 0.108 ± 0.030    |
| FS (%)     | 20.055 ± 1.531 | 23.761 ± 0.040* | 25.148 ± 1.035*# |

MSC, mesenchymal stem cells; AC/MSC, apicidin-treated MSCs, IVSd, intraventricular septal width in diastole; IVSs, intraventricular septal width in systole; LVIDd, left ventricular internal dimension in diastole; LVIDs, left ventricular internal dimension in systole; LVPWd, left ventricular posterior wall thickness in diastole; LVPWs, left ventricular posterior wall thickness in systole; EDV, end-diastolic volume; ESV, end-systolic volume; EF, ejection fraction; SV, stroke volume; FS, fractional shortening

\*,  $p < 0.05$  vs. MI+PBS group, #,  $p < 0.05$  vs. MI+MSC group

**Supplementary Table 2: Echocardiographic evaluation after myocardial infarction (MI)**

|            | MI + AC/MSC    | MI + MSC Mix    |
|------------|----------------|-----------------|
| IVSd (mm)  | 0.370 ± 0.048  | 0.333 ± 0.049   |
| IVSs (mm)  | 0.340 ± 0.070  | 0.333 ± 0.065   |
| LVIDd (mm) | 3.690 ± 0.507  | 4.133 ± 0.644   |
| LVIDs (mm) | 3.040 ± 0.458  | 3.183 ± 0.603   |
| LVPWd (mm) | 0.444 ± 0.073  | 0.408 ± 0.051   |
| LVPWs (mm) | 0.478 ± 0.083  | 0.467 ± 0.078   |
| EDV (mL)   | 0.132 ± 0.053  | 0.185 ± 0.085   |
| ESV (mL)   | 0.078 ± 0.040  | 0.089 ± 0.049   |
| EF (%)     | 43.508 ± 4.765 | 52.863 ± 5.780* |
| SV (mL)    | 0.061 ± 0.018  | 0.100 ± 0.036*  |
| FS (%)     | 18.051 ± 2.316 | 23.169 ± 3.175* |

MSC, mesenchymal stem cells; AC/MSC, apicidin-treated MSCs, IVSd, intraventricular septal width in diastole; IVSs, intraventricular septal width in systole; LVIDd, left ventricular internal dimension in diastole; LVIDs, left ventricular internal dimension in systole; LVPWd, left ventricular posterior wall thickness in diastole; LVPWs, left ventricular posterior wall thickness in systole; EDV, end-diastolic volume; ESV, end-systolic volume; EF, ejection fraction; SV, stroke volume; FS, fractional shortening

\*,  $p < 0.05$  vs. MI+PBS group

\*,  $p < 0.05$  vs. MI+PBS group
